# Supplementary material
Source: PubMed Central journal article supplement (PMC2914483)
Supplement: NIHMS213655-supplement-2_si_002.pdf [file NIHMS213655-supplement-2_si_002.pdf]

## SUPPORTING INFORMATION

### The Effect of Structure on Nitroxide EPR Spectral Linewidth

Scott R. Burks,<sup>†,¶</sup> Mallory A. Makowsky,<sup>‡</sup> Zachary A. Yaffe,<sup>‡</sup> Chad Hoggle,<sup>‡</sup> Pei Tsai,<sup>†,‡</sup>  
Sukumaran Muralidharan,<sup>†</sup> Michael K. Bowman,<sup>§</sup> Joseph P.Y. Kao,<sup>†,¶</sup>, and Gerald M. Rosen,<sup>\*,†,‡</sup>

<sup>†</sup> Center for Biomedical Engineering and Technology, University of Maryland, Baltimore, MD, 21201  
and Center for EPR Imaging In Vivo Physiology, University of Maryland, Baltimore, MD 21201

<sup>¶</sup> Department of Physiology, University of Maryland School of Medicine, Baltimore, MD 21201

<sup>‡</sup> Department of Pharmaceutical Sciences, University of Maryland School of Pharmacy, Baltimore, MD  
21201

<sup>§</sup> Department of Chemistry, The University of Alabama, Tuscaloosa, AL 35487

| <b>Table of Contents</b>                                                                                          | <b>Page</b> |
|-------------------------------------------------------------------------------------------------------------------|-------------|
| <b>Table 1.</b> Crystal data and structure refinement for nitroxide <b>7</b>                                      | 2           |
| <b>Table 2.</b> Atomic coordinates and equivalent isotropic atomic displacement parameters for nitroxide <b>7</b> | 3           |
| <b>Table 3.</b> Anisotropic atomic displacement parameters for nitroxide <b>7</b>                                 | 3           |
| <b>Table 4.</b> Hydrogen atom coordinates and isotropic atomic displacement parameters for nitroxide <b>7</b>     | 4           |
| <b>Table 5.</b> Site occupancy factors that deviate from unity for nitroxide <b>7</b>                             | 4           |
| <b>Table 6.</b> Bond lengths, valence and torsion angles for nitroxide <b>7</b>                                   | 5           |
| Quantum chemical coordinates for nitroxide <b>5</b>                                                               | 6           |
| Quantum chemical coordinates for nitroxide <b>6</b>                                                               | 7           |
| Quantum chemical coordinates for nitroxide <b>7</b>                                                               | 8           |
| Quantum chemical coordinates for nitroxide <b>8</b>                                                               | 9           |

**Table 1.** Crystal data and structure refinement for nitroxide **7**

|                                     |                                                                                                                                                                       |                   |
|-------------------------------------|-----------------------------------------------------------------------------------------------------------------------------------------------------------------------|-------------------|
| Empirical formula                   | C <sub>12</sub> H <sub>20</sub> NO <sub>3</sub>                                                                                                                       |                   |
| Formula weight                      | 226.29                                                                                                                                                                |                   |
| Temperature                         | 250(2) K                                                                                                                                                              |                   |
| Wavelength                          | 0.71073 Å                                                                                                                                                             |                   |
| Crystal size                        | 0.53 × 0.50 × 0.40 mm <sup>3</sup>                                                                                                                                    |                   |
| Crystal habit                       | orange bulk                                                                                                                                                           |                   |
| Crystal system                      | Monoclinic                                                                                                                                                            |                   |
| Space group                         | P2 <sub>1</sub> /c                                                                                                                                                    |                   |
| Unit cell dimensions                | a = 7.7657(7) Å                                                                                                                                                       | α = 90°           |
|                                     | b = 15.5387(14) Å                                                                                                                                                     | β = 109.5925(10)° |
|                                     | c = 11.2639(10) Å                                                                                                                                                     | γ = 90°           |
| Volume                              | 1280.5(2) Å <sup>3</sup>                                                                                                                                              |                   |
| Z                                   | 4                                                                                                                                                                     |                   |
| Density, ρ <sub>calc</sub>          | 1.174 g/cm <sup>3</sup>                                                                                                                                               |                   |
| Absorption coefficient, μ           | 0.084 mm <sup>-1</sup>                                                                                                                                                |                   |
| F(000)                              | 492 e <sup>-</sup>                                                                                                                                                    |                   |
| Diffractometer                      | Bruker Smart Apex II CCD area detector                                                                                                                                |                   |
| Radiation source                    | fine-focus sealed tube, MoKα                                                                                                                                          |                   |
| Detector distance                   | 5.800 cm                                                                                                                                                              |                   |
| Detector resolution                 | 11.2 pixels/mm                                                                                                                                                        |                   |
| Total frames                        | 1830                                                                                                                                                                  |                   |
| Frame size                          | 512 pixels                                                                                                                                                            |                   |
| Frame width                         | -0.30°                                                                                                                                                                |                   |
| Exposure per frame                  | 45 sec                                                                                                                                                                |                   |
| Total measurement time              | 25.9 hours                                                                                                                                                            |                   |
| Data collection method              | ω scans                                                                                                                                                               |                   |
| θ range for data collection         | 2.32 to 25.00°                                                                                                                                                        |                   |
| Index ranges                        | -9 ≤ h ≤ 9, -18 ≤ k ≤ 18, -13 ≤ l ≤ 13                                                                                                                                |                   |
| Reflections collected               | 9232                                                                                                                                                                  |                   |
| Independent reflections             | 2268                                                                                                                                                                  |                   |
| Observed reflection, I > 2σ(I)      | 1909                                                                                                                                                                  |                   |
| Coverage of independent reflections | 100.0 %                                                                                                                                                               |                   |
| Variation in check reflections      | 0 %                                                                                                                                                                   |                   |
| Absorption correction               | Semi-empirical from equivalents<br>SADABS (Sheldrick, 1996)                                                                                                           |                   |
| Max. and min. transmission          | 0.967 and 0.914                                                                                                                                                       |                   |
| Structure solution technique        | direct                                                                                                                                                                |                   |
| Structure solution program          | SHELXS-97 (Sheldrick, 1990)                                                                                                                                           |                   |
| Refinement technique                | Full-matrix least-squares on F <sup>2</sup>                                                                                                                           |                   |
| Refinement program                  | SHELXL-97 (Sheldrick, 1997)                                                                                                                                           |                   |
| Function minimized                  | Σw(F <sub>o</sub> <sup>2</sup> - F <sub>c</sub> <sup>2</sup> ) <sup>2</sup>                                                                                           |                   |
| Data / restraints / parameters      | 2268 / 0 / 161                                                                                                                                                        |                   |
| Goodness-of-fit on F <sup>2</sup>   | 1.000                                                                                                                                                                 |                   |
| Δ/σ <sub>max</sub>                  | 0.000                                                                                                                                                                 |                   |
| Final R indices:                    | R <sub>1</sub> , I > 2σ(I)                                                                                                                                            | 0.0488            |
|                                     | wR <sub>2</sub> , all data                                                                                                                                            | 0.0970            |
|                                     | R <sub>int</sub>                                                                                                                                                      | 0.0220            |
|                                     | R <sub>sig</sub>                                                                                                                                                      | 0.0216            |
| Weighting scheme                    | w = 1/[σ <sup>2</sup> (F <sub>o</sub> <sup>2</sup> ) + (0.005P) <sup>2</sup> + 0.9535P], P = [max(F <sub>o</sub> <sup>2</sup> , 0) + 2F <sub>o</sub> <sup>2</sup> ]/3 |                   |
| Largest diff. peak and hole         | 0.439 and -0.157 e <sup>-</sup> /Å <sup>3</sup>                                                                                                                       |                   |

$$R_1 = \frac{\sum |F_o - |F_c||}{\sum |F_o|}, \quad wR_2 = \left[ \frac{\sum w(F_o^2 - F_c^2)^2}{\sum w(F_o^2)^2} \right]^{1/2}$$

**Table 2.** Atomic coordinates and equivalent\* isotropic atomic displacement parameters ( $\text{\AA}^2$ ) for nitroxide **7**

| Atom | $x/a$     | $y/b$       | $z/c$       | $U_{\text{eq}}$ |
|------|-----------|-------------|-------------|-----------------|
| O1   | 0.6610(2) | 0.38706(11) | 0.89383(14) | 0.0741(5)       |
| N1   | 0.5555(2) | 0.35818(10) | 0.78880(14) | 0.0468(4)       |
| C2   | 0.3837(2) | 0.40869(12) | 0.72710(19) | 0.0484(5)       |
| C2A  | 0.4312(3) | 0.49318(14) | 0.6750(2)   | 0.0685(7)       |
| C2B  | 0.2963(3) | 0.42736(15) | 0.8258(2)   | 0.0652(6)       |
| C3   | 0.2518(2) | 0.35544(12) | 0.61889(18) | 0.0475(5)       |
| C4   | 0.3469(2) | 0.31039(12) | 0.54149(18) | 0.0441(4)       |
| C5   | 0.4927(3) | 0.25126(12) | 0.61718(18) | 0.0488(5)       |
| C6   | 0.6412(2) | 0.29927(13) | 0.71939(18) | 0.0486(5)       |
| C6A  | 0.7623(3) | 0.35100(16) | 0.6627(2)   | 0.0672(6)       |
| C6B  | 0.7577(3) | 0.23421(15) | 0.8149(2)   | 0.0681(6)       |
| C7   | 0.3122(3) | 0.32013(12) | 0.41688(18) | 0.0479(5)       |
| C8   | 0.1776(2) | 0.37773(12) | 0.33009(17) | 0.0434(4)       |
| O8   | 0.0882(2) | 0.43324(10) | 0.35579(13) | 0.0633(4)       |
| O9   | 0.1677(2) | 0.35998(9)  | 0.21150(13) | 0.0609(4)       |
| C9   | 0.0499(3) | 0.41343(16) | 0.11337(19) | 0.0699(7)       |

\*  $U_{\text{eq}}$  is defined as one third of the trace of the orthogonalized  $U_{ij}$  tensor.

**Table 3.** Anisotropic atomic displacement parameters\* ( $\text{\AA}^2$ ) for nitroxide **7**

| Atom | $U_{11}$   | $U_{22}$   | $U_{33}$   | $U_{23}$    | $U_{13}$   | $U_{12}$    |
|------|------------|------------|------------|-------------|------------|-------------|
| O1   | 0.0580(9)  | 0.0932(12) | 0.0558(9)  | -0.0184(9)  | -0.0012(7) | 0.0092(9)   |
| N1   | 0.0388(8)  | 0.0507(9)  | 0.0459(9)  | -0.0006(7)  | 0.0076(7)  | 0.0034(7)   |
| C2   | 0.0427(10) | 0.0430(10) | 0.0575(12) | 0.0043(9)   | 0.0143(9)  | 0.0073(8)   |
| C2A  | 0.0667(15) | 0.0466(12) | 0.0866(17) | 0.0065(12)  | 0.0182(13) | -0.0006(11) |
| C2B  | 0.0612(13) | 0.0678(15) | 0.0663(14) | -0.0059(12) | 0.0208(11) | 0.0159(11)  |
| C3   | 0.0350(9)  | 0.0480(11) | 0.0561(12) | 0.0046(9)   | 0.0107(8)  | 0.0020(8)   |
| C4   | 0.0376(9)  | 0.0401(10) | 0.0542(11) | -0.0031(8)  | 0.0147(8)  | -0.0059(8)  |
| C5   | 0.0474(10) | 0.0449(10) | 0.0554(12) | 0.0016(9)   | 0.0190(9)  | 0.0029(9)   |
| C6   | 0.0403(10) | 0.0531(11) | 0.0536(11) | 0.0006(9)   | 0.0173(9)  | 0.0029(9)   |
| C6A  | 0.0503(12) | 0.0763(16) | 0.0804(16) | -0.0046(13) | 0.0289(12) | -0.0097(11) |
| C6B  | 0.0547(13) | 0.0720(15) | 0.0718(15) | 0.0056(12)  | 0.0134(11) | 0.0210(11)  |
| C7   | 0.0431(10) | 0.0450(10) | 0.0543(12) | -0.0028(9)  | 0.0145(9)  | 0.0021(8)   |
| C8   | 0.0386(10) | 0.0420(10) | 0.0463(11) | -0.0038(8)  | 0.0097(8)  | -0.0028(8)  |
| O8   | 0.0658(9)  | 0.0604(9)  | 0.0605(9)  | 0.0002(7)   | 0.0168(7)  | 0.0180(8)   |
| O9   | 0.0636(9)  | 0.0651(9)  | 0.0474(8)  | -0.0012(7)  | 0.0097(7)  | 0.0130(7)   |
| C9   | 0.0735(15) | 0.0787(16) | 0.0447(12) | 0.0041(11)  | 0.0029(11) | 0.0196(13)  |

\* The anisotropic atomic displacement factor exponent takes the form:  $-2\pi^2 [ h^2 a^{*2} U_{11} + \dots + 2hka^* b^* U_{12} ]$

**Table 4.** Hydrogen atom coordinates and isotropic atomic displacement parameters ( $\text{\AA}^2$ ) for nitroxide **7**

| Atom | $x/a$   | $y/b$  | $z/c$  | $U_{\text{iso}}$ |
|------|---------|--------|--------|------------------|
| H2A1 | 0.5193  | 0.5250 | 0.7425 | 0.075(6)         |
| H2A2 | 0.3213  | 0.5274 | 0.6399 | 0.075(6)         |
| H2A3 | 0.4832  | 0.4807 | 0.6097 | 0.075(6)         |
| H2A4 | 0.3633  | 0.4970 | 0.5856 | 0.075(6)         |
| H2A5 | 0.5612  | 0.4946 | 0.6882 | 0.075(6)         |
| H2A6 | 0.3993  | 0.5413 | 0.7184 | 0.075(6)         |
| H2B1 | 0.2718  | 0.3736 | 0.8610 | 0.060(5)         |
| H2B2 | 0.1826  | 0.4582 | 0.7874 | 0.060(5)         |
| H2B3 | 0.3785  | 0.4622 | 0.8923 | 0.060(5)         |
| H2B4 | 0.2834  | 0.4891 | 0.8328 | 0.060(5)         |
| H2B5 | 0.3727  | 0.4045 | 0.9064 | 0.060(5)         |
| H2B6 | 0.1767  | 0.4005 | 0.8015 | 0.060(5)         |
| H3A  | 0.1901  | 0.3127 | 0.6545 | 0.058(4)         |
| H3B  | 0.1581  | 0.3937 | 0.5643 | 0.058(4)         |
| H5A  | 0.5474  | 0.2220 | 0.5615 | 0.055(4)         |
| H5B  | 0.4387  | 0.2073 | 0.6564 | 0.055(4)         |
| H6A1 | 0.6862  | 0.3869 | 0.5949 | 0.074(4)         |
| H6A2 | 0.8327  | 0.3118 | 0.6299 | 0.074(4)         |
| H6A3 | 0.8448  | 0.3870 | 0.7273 | 0.074(4)         |
| H6B1 | 0.8581  | 0.2639 | 0.8767 | 0.090(5)         |
| H6B2 | 0.8059  | 0.1916 | 0.7715 | 0.090(5)         |
| H6B3 | 0.6830  | 0.2060 | 0.8572 | 0.090(5)         |
| H7   | 0.3822  | 0.2861 | 0.3811 | 0.068(7)         |
| H9A  | -0.0752 | 0.4074 | 0.1117 | 0.076(6)         |
| H9B  | 0.0580  | 0.3959 | 0.0327 | 0.076(6)         |
| H9C  | 0.0875  | 0.4730 | 0.1295 | 0.076(6)         |
| H9D  | 0.1221  | 0.4435 | 0.0709 | 0.076(6)         |
| H9E  | -0.0111 | 0.4550 | 0.1499 | 0.076(6)         |
| H9F  | -0.0407 | 0.3778 | 0.0531 | 0.076(6)         |

**Table 5.** Site occupancy factors that deviate from unity for nitroxide **7**

| Atom | sof     | Atom | sof     | Atom | sof     |
|------|---------|------|---------|------|---------|
| H2A1 | 0.93(3) | H2A2 | 0.93(3) | H2A3 | 0.93(3) |
| H2A4 | 0.07(3) | H2A5 | 0.07(3) | H2A6 | 0.07(3) |
| H2B1 | 0.86(2) | H2B2 | 0.86(2) | H2B3 | 0.86(2) |
| H2B4 | 0.14(2) | H2B5 | 0.14(2) | H2B6 | 0.14(2) |
| H9A  | 0.75(3) | H9B  | 0.75(3) | H9C  | 0.75(3) |
| H9D  | 0.25(3) | H9E  | 0.25(3) | H9F  | 0.25(3) |

**Table 6.** Bond lengths (Å), valence and torsion angles (°) for nitroxide **7**

|              |             |              |             |              |            |
|--------------|-------------|--------------|-------------|--------------|------------|
| O1-N1        | 1.2736(19)  | N1-C6        | 1.497(2)    | N1-C2        | 1.502(2)   |
| C2-C2B       | 1.512(3)    | C2-C2A       | 1.533(3)    | C2-C3        | 1.543(3)   |
| C3-C4        | 1.492(3)    | C4-C7        | 1.346(3)    | C4-C5        | 1.485(3)   |
| C5-C6        | 1.523(3)    | C6-C6A       | 1.530(3)    | C6-C6B       | 1.532(3)   |
| C7-C8        | 1.471(3)    | C8-O8        | 1.202(2)    | C8-O9        | 1.341(2)   |
| O9-C9        | 1.439(2)    |              |             |              |            |
| O1-N1-C6     | 116.12(14)  | O1-N1-C2     | 116.14(15)  | C6-N1-C2     | 124.00(15) |
| N1-C2-C2B    | 107.93(16)  | N1-C2-C2A    | 109.53(16)  | C2B-C2-C2A   | 110.00(18) |
| N1-C2-C3     | 109.67(15)  | C2B-C2-C3    | 109.91(17)  | C2A-C2-C3    | 109.78(17) |
| C4-C3-C2     | 112.66(15)  | C7-C4-C5     | 121.04(17)  | C7-C4-C3     | 126.24(17) |
| C5-C4-C3     | 112.72(16)  | C4-C5-C6     | 111.66(16)  | N1-C6-C5     | 109.74(14) |
| N1-C6-C6A    | 109.87(16)  | C5-C6-C6A    | 110.93(17)  | N1-C6-C6B    | 107.34(16) |
| C5-C6-C6B    | 109.08(17)  | C6A-C6-C6B   | 109.81(17)  | C4-C7-C8     | 127.63(18) |
| O8-C8-O9     | 122.87(17)  | O8-C8-C7     | 128.00(18)  | O9-C8-C7     | 109.12(16) |
| C8-O9-C9     | 117.14(16)  |              |             |              |            |
| O1-N1-C2-C2B | -47.4(2)    | C6-N1-C2-C2B | 155.33(17)  | O1-N1-C2-C2A | 72.4(2)    |
| C6-N1-C2-C2A | -84.9(2)    | O1-N1-C2-C3  | -167.09(16) | C6-N1-C2-C3  | 35.6(2)    |
| N1-C2-C3-C4  | -42.5(2)    | C2B-C2-C3-C4 | -160.97(17) | C2A-C2-C3-C4 | 77.9(2)    |
| C2-C3-C4-C7  | -121.0(2)   | C2-C3-C4-C5  | 58.3(2)     | C7-C4-C5-C6  | 118.40(19) |
| C3-C4-C5-C6  | -60.9(2)    | O1-N1-C6-C5  | 164.37(17)  | C2-N1-C6-C5  | -38.3(2)   |
| O1-N1-C6-C6A | -73.4(2)    | C2-N1-C6-C6A | 83.9(2)     | O1-N1-C6-C6B | 45.9(2)    |
| C2-N1-C6-C6B | -156.75(17) | C4-C5-C6-N1  | 47.6(2)     | C4-C5-C6-C6A | -74.0(2)   |
| C4-C5-C6-C6B | 164.92(17)  | C5-C4-C7-C8  | -177.88(17) | C3-C4-C7-C8  | 1.4(3)     |
| C4-C7-C8-O8  | 8.9(3)      | C4-C7-C8-O9  | -171.64(18) | O8-C8-O9-C9  | 2.9(3)     |
| C7-C8-O9-C9  | -176.56(17) |              |             |              |            |

| nitroxide 5 |          | Coordinates in Angstroms |          |  |
|-------------|----------|--------------------------|----------|--|
| Atom        | X        | Y                        | Z        |  |
| O           | -0.05384 | -0.31617                 | 0.087824 |  |
| N           | 0.02212  | 0.087926                 | 1.30304  |  |
| C           | 1.352987 | 0.010823                 | 1.982535 |  |
| C           | -1.22598 | 0.605345                 | 1.945856 |  |
| C           | -1.43167 | 2.071499                 | 1.510083 |  |
| H           | -1.41982 | 2.130241                 | 0.418717 |  |
| H           | -2.39556 | 2.445275                 | 1.869941 |  |
| H           | -0.64925 | 2.73095                  | 1.897381 |  |
| C           | -2.40765 | -0.24715                 | 1.458464 |  |
| H           | -2.25757 | -1.30048                 | 1.712478 |  |
| H           | -3.32975 | 0.097826                 | 1.936207 |  |
| H           | -2.51481 | -0.17186                 | 0.376331 |  |
| C           | 2.439798 | 0.358245                 | 0.95359  |  |
| H           | 2.279526 | 1.359081                 | 0.542272 |  |
| H           | 3.421815 | 0.333586                 | 1.43585  |  |
| H           | 2.428183 | -0.35299                 | 0.127656 |  |
| C           | 1.563217 | -1.43171                 | 2.489343 |  |
| H           | 0.854604 | -1.69936                 | 3.278799 |  |
| H           | 1.430978 | -2.13036                 | 1.659237 |  |
| H           | 2.574795 | -1.55218                 | 2.889998 |  |
| C           | -1.10155 | 0.482661                 | 3.477098 |  |
| H           | -1.93818 | 0.985169                 | 3.971125 |  |
| H           | -1.16643 | -0.57689                 | 3.761098 |  |
| C           | 1.396989 | 1.028669                 | 3.138894 |  |
| H           | 2.301139 | 0.888595                 | 3.738454 |  |
| H           | 1.456075 | 2.044568                 | 2.724186 |  |
| C           | 0.194961 | 1.011106                 | 4.069949 |  |
| O           | 0.266474 | 1.397                    | 5.219966 |  |

nitroxide **6**      Coordinates in Angstroms

| Atom | X        | Y        | Z        |
|------|----------|----------|----------|
| O    | -0.05328 | -0.35322 | 0.094177 |
| N    | 0.026856 | 0.082646 | 1.298472 |
| C    | 1.351455 | 0.002294 | 1.985076 |
| C    | -1.21281 | 0.612137 | 1.952013 |
| C    | -1.40222 | 2.093501 | 1.561294 |
| H    | -1.35805 | 2.19144  | 0.472942 |
| H    | -2.38052 | 2.447421 | 1.902675 |
| H    | -0.64643 | 2.740235 | 2.01039  |
| C    | -2.40627 | -0.2071  | 1.436614 |
| H    | -2.2725  | -1.27089 | 1.65348  |
| H    | -3.32219 | 0.136619 | 1.927123 |
| H    | -2.51494 | -0.09445 | 0.357768 |
| C    | 2.443515 | 0.344256 | 0.958837 |
| H    | 2.295233 | 1.350063 | 0.55531  |
| H    | 3.426681 | 0.302866 | 1.438131 |
| H    | 2.42046  | -0.36072 | 0.127639 |
| C    | 1.564542 | -1.4387  | 2.496012 |
| H    | 0.842609 | -1.71561 | 3.269098 |
| H    | 1.454986 | -2.13719 | 1.662189 |
| H    | 2.570248 | -1.55157 | 2.914584 |
| C    | -1.08294 | 0.417999 | 3.47508  |
| H    | -1.93545 | 0.890221 | 3.973222 |
| H    | -1.15159 | -0.65461 | 3.685625 |
| C    | 1.375393 | 1.041181 | 3.120808 |
| H    | 2.33123  | 0.954217 | 3.651896 |
| H    | 1.356498 | 2.038686 | 2.669554 |
| C    | 0.199883 | 0.967806 | 4.116698 |
| H    | 0.468306 | 0.305492 | 4.95335  |
| O    | -0.10276 | 2.27021  | 4.630562 |
| H    | 0.700845 | 2.622065 | 5.037047 |

| nitroxide 7 |          | Coordinates in Angstroms |          |  |
|-------------|----------|--------------------------|----------|--|
| Atom        | X        | Y                        | Z        |  |
| O           | -0.02347 | -0.43094                 | 0.091969 |  |
| N           | 0.030316 | 0.036384                 | 1.285756 |  |
| C           | 1.352772 | 0.030769                 | 1.978097 |  |
| C           | -1.21828 | 0.584405                 | 1.894119 |  |
| C           | -1.3967  | 2.053829                 | 1.45177  |  |
| H           | -1.33949 | 2.11531                  | 0.361695 |  |
| H           | -2.37575 | 2.427449                 | 1.769267 |  |
| H           | -0.63513 | 2.714627                 | 1.873858 |  |
| C           | -2.40376 | -0.24299                 | 1.37332  |  |
| H           | -2.27314 | -1.30214                 | 1.611788 |  |
| H           | -3.32767 | 0.109015                 | 1.842499 |  |
| H           | -2.49399 | -0.14979                 | 0.291117 |  |
| C           | 2.433553 | 0.43758                  | 0.964915 |  |
| H           | 2.241906 | 1.440914                 | 0.572601 |  |
| H           | 3.414964 | 0.435617                 | 1.449169 |  |
| H           | 2.44719  | -0.258                   | 0.12569  |  |
| C           | 1.628828 | -1.39549                 | 2.495047 |  |
| H           | 0.918334 | -1.69151                 | 3.272284 |  |
| H           | 1.54861  | -2.10286                 | 1.665758 |  |
| H           | 2.637538 | -1.46245                 | 2.915535 |  |
| C           | -1.15207 | 0.446452                 | 3.431054 |  |
| H           | -1.99094 | 0.992079                 | 3.868666 |  |
| H           | -1.32862 | -0.60426                 | 3.694986 |  |
| C           | 1.312741 | 1.055878                 | 3.129822 |  |
| H           | 2.259004 | 1.010713                 | 3.677717 |  |
| H           | 1.262008 | 2.059979                 | 2.68785  |  |
| C           | 0.148447 | 0.875673                 | 4.075824 |  |
| C           | 0.33862  | 1.078688                 | 5.394786 |  |
| H           | 1.327967 | 1.361793                 | 5.742776 |  |
| C           | -0.6173  | 0.995769                 | 6.515906 |  |
| O           | -0.32471 | 1.297108                 | 7.657912 |  |
| O           | -1.85217 | 0.540405                 | 6.174089 |  |
| C           | -2.78506 | 0.450142                 | 7.263044 |  |
| H           | -3.70686 | 0.062849                 | 6.829    |  |
| H           | -2.41079 | -0.22546                 | 8.035798 |  |
| H           | -2.95435 | 1.43279                  | 7.710051 |  |



| nitroxide 8 |          | Coordinates in Angstroms |          |  |
|-------------|----------|--------------------------|----------|--|
| Atom        | X        | Y                        | Z        |  |
| O           | -0.00145 | 0.080137                 | -0.0047  |  |
| N           | 0.002214 | 0.030535                 | 1.277361 |  |
| C           | 1.321498 | 0.00066                  | 1.974462 |  |
| C           | -1.30858 | 0.029574                 | 1.992211 |  |
| C           | -1.80765 | 1.484238                 | 2.134455 |  |
| H           | -1.80661 | 1.965732                 | 1.152993 |  |
| H           | -2.82984 | 1.496658                 | 2.526586 |  |
| H           | -1.18425 | 2.076507                 | 2.809467 |  |
| C           | -2.31327 | -0.76603                 | 1.143662 |  |
| H           | -1.95408 | -1.78411                 | 0.968884 |  |
| H           | -3.27222 | -0.82013                 | 1.668188 |  |
| H           | -2.46177 | -0.28926                 | 0.174855 |  |
| C           | 2.281052 | 0.946564                 | 1.237033 |  |
| H           | 1.894223 | 1.969995                 | 1.235191 |  |
| H           | 3.256841 | 0.944063                 | 1.732462 |  |
| H           | 2.404682 | 0.629787                 | 0.201426 |  |
| C           | 1.870482 | -1.43992                 | 1.932739 |  |
| H           | 1.248425 | -2.13055                 | 2.509386 |  |
| H           | 1.901479 | -1.78593                 | 0.896426 |  |
| H           | 2.884923 | -1.47563                 | 2.34312  |  |
| C           | -1.15535 | -0.66474                 | 3.362549 |  |
| H           | -2.07784 | -0.52761                 | 3.930069 |  |
| H           | -1.08034 | -1.74757                 | 3.197255 |  |
| C           | 1.123356 | 0.49354                  | 3.422579 |  |
| H           | 2.076791 | 0.426237                 | 3.955705 |  |
| H           | 0.868599 | 1.561257                 | 3.384186 |  |
| C           | 0.042092 | -0.23821                 | 4.184254 |  |
| C           | 0.217699 | -0.47828                 | 5.499344 |  |
| H           | 1.136867 | -0.14846                 | 5.974502 |  |
| C           | -0.67691 | -1.13881                 | 6.464393 |  |
| O           | -0.42838 | -1.22893                 | 7.65179  |  |
| O           | -1.81882 | -1.66561                 | 5.938129 |  |
| H           | -2.28743 | -2.05652                 | 6.694906 |  |
